# Supplementary material for: Targeting HSF1 disrupts HSP90 chaperone function in chronic lymphocytic leukemia
Source: PubMed Central journal article supplement (PMC4741638; doi:10.18632/oncotarget.5167), 2015-09-10
Supplement: oncotarget-06-31767-s001.pdf [file oncotarget-06-31767-s001.pdf]

**SUPPLEMENTARY FIGURES**

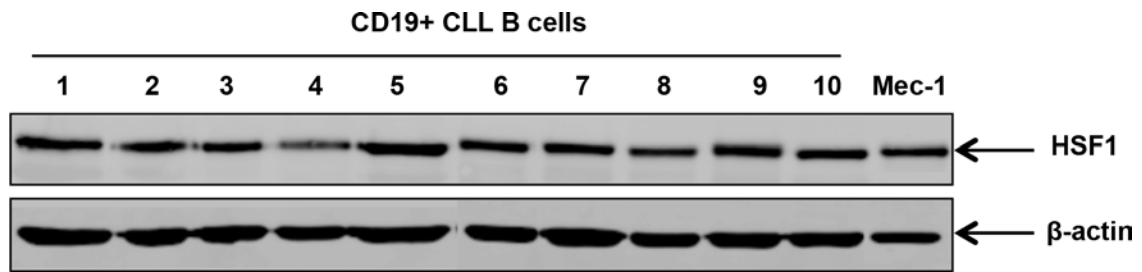

**Supplementary Figure S1:** CD19 + B cells lysates from CLL patients were immunoblotted for HSF1. β-actin was used as a loading control.

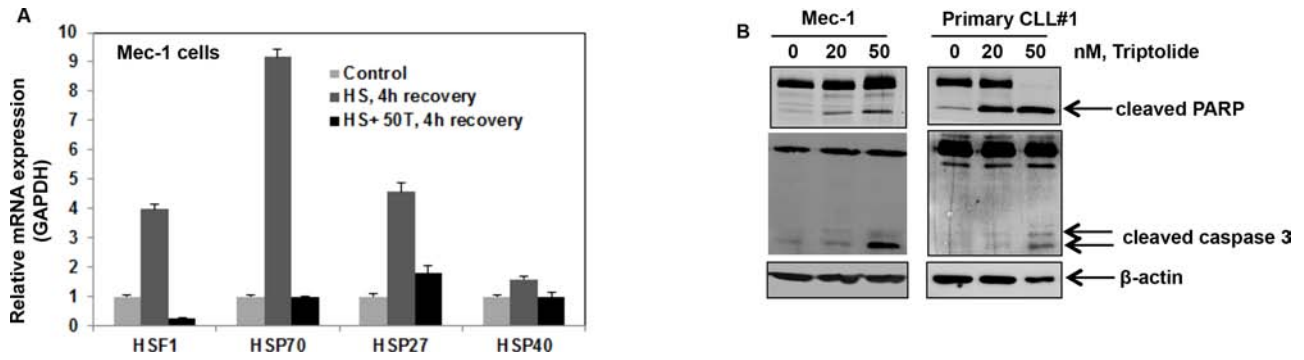

**Supplementary Figure S2: A.** Mec-1 cells were exposed to heat shock at 42°C for 1 hour (HS) and returned to 37°C for 4 hours, with or without the addition of triptolide. RNA was isolated from the resulting samples and they were reverse transcribed. q-PCR analysis was performed for the indicated mRNAs. GAPDH was used as an internal control. **B.** Mec-1 and Primary CLL cells were exposed to indicated-doses of triptolide and the expression of PARP and cleaved caspase 3 was assessed by immunoblot analysis.  $\beta$ -actin was used as loading control.

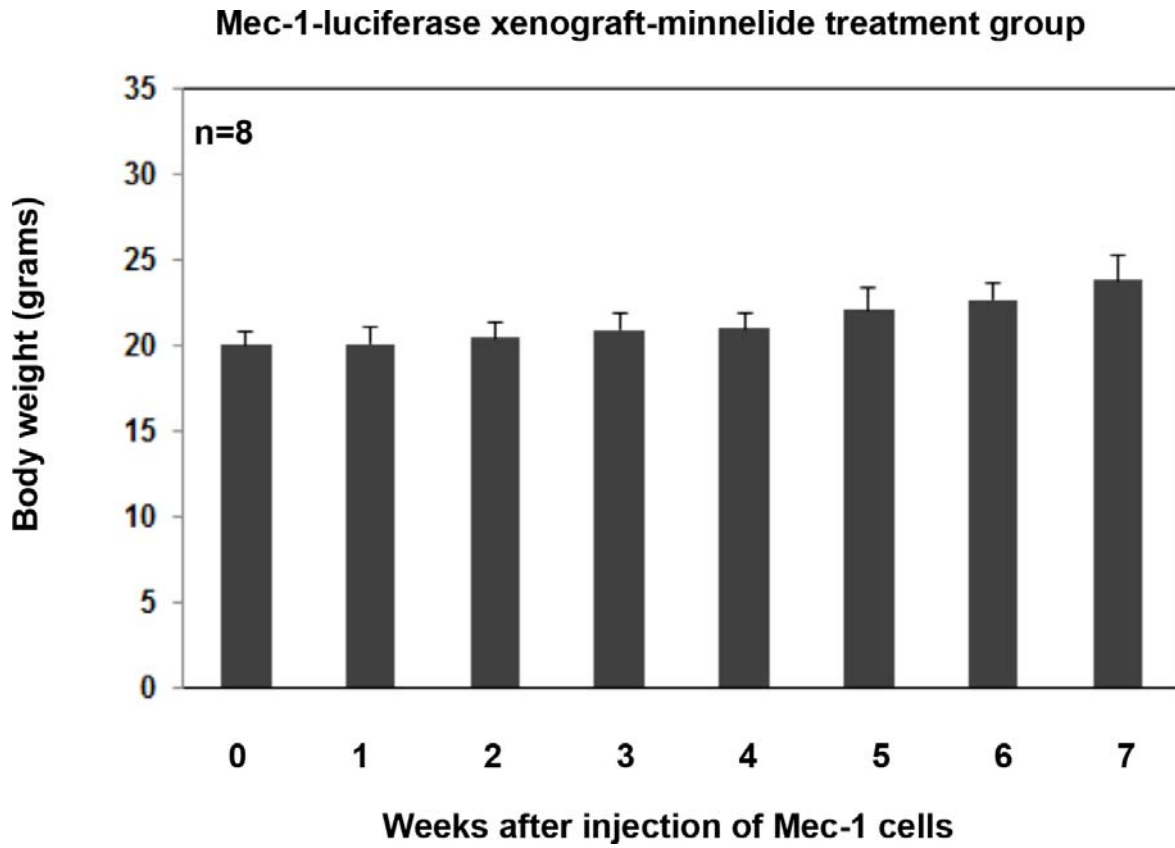

Supplementary Figure S3: Average body weights collected over a span of 7 weeks for the minnelide-treated mice.

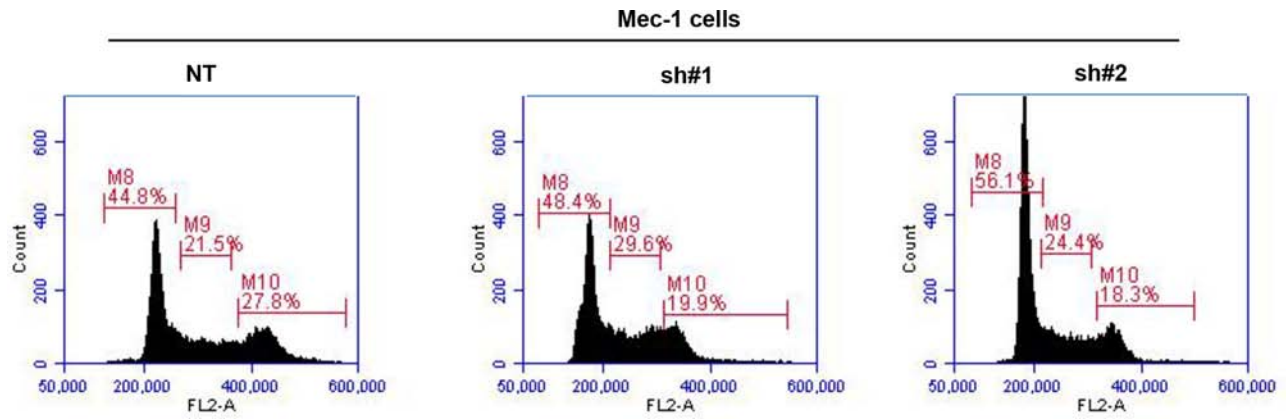

**Supplementary Figure S4: Distribution of Mec-1 cells in G0-G1 (M8), G1-S (M9) and G2-M (M10) phase of cell cycle in non-targeted shRNA versus shHSF1-infected cells. FL2-A represents propidium iodide staining.**
